# Supplementary material for: PbXND1 Results in a Xylem-Deficient Dwarf Phenotype through Interaction with PbTCP4 in Pear (Pyrus bretschneideri Rehd.)
Source: MDPI journal article supplement (doi:10.3390/ijms23158699), 2022-08-04
Supplement: s1 [file s1]

Table S1 Primers used in this study

| Abbreviation | Forward (5' to 3')                                  | Reverse (5' to 3')                             | Function            |
|--------------|-----------------------------------------------------|------------------------------------------------|---------------------|
| PbXND1       | GGGCAAGCAGTGGTATTTCTA                               | CACAACTCTGAGGCTGACGAAG                         | RT - PCR            |
| MYC          | GAACAGAAACTGATCTCTGAAG                              |                                                |                     |
| PbTCP4       | GTGGAGACCCACAATCCGA                                 | GTGGAGACCCACAATCCGA                            |                     |
| Pb4CL        | CTTGGACAGGGGTATGGAATG                               | AGCGAAGCACCCGTATCAG                            |                     |
| PbC3H        | TGATTACTGCGGGTATGGACA                               | AGCATTAGTGGTGTGGAGGG                           |                     |
| PbHCT        | GACGCCAAAGAAGGCACTG                                 | GGGTAGAACGGCACAAGAGC                           |                     |
| PbCCR        | CAGAACAAATGGTGGAGCCC                                | CCGATTGACGACGTGAAAAC                           |                     |
| PbCCoAOMT    | TACCCAAGGGAGCCTGAATC                                | AGTAGCCAGTGTAGACCCCAATC                        |                     |
| PbCAD        | CCTCCTTGTTGGTTGCTGC                                 | CCGCCTTGGGTGGTTTT                              |                     |
| PbVND7       | TACAAGGGACGGGCACCTAA                                | CCGGCATAACAACCCATCCTT                          |                     |
| PbMYB46      | CGGAGGGTTCATTAGTCCCG                                | CAAACATGTGGTTGAGGATCG                          |                     |
| PbMYB83      | AGTCCCACATGCTTCCCA                                  | CTCAATGCTTCTGCTTTCG                            |                     |
| PbCES4       | ACGTTGTCCATGCCACTGAA                                | AGTCATAACAAGGCCGGCAA                           |                     |
| PbCES7       | CAACGCCGCTGCCAGAT                                   | TGAGCGTGCGATGAGTATGTG                          |                     |
| PbCES8       | AACACCCCAACTTCCACACC                                | CCACTTGCCAATCTGGGACT                           |                     |
| PbNST1       | GATATGCAGCAACTGCAGGC                                | AGATTGCGCAAACCAACCCAT                          | LUC assay           |
| PbXND1       | tagaactagtggatccATGGGAGATAACC<br>AGTTTAAGCTC        | cggatcgataagcttTTAATTTGGCAAA<br>CTTATTTTCATC   |                     |
| PbTCP4       | tagaactagtggatccATGGGGGATTCTCA<br>CCACC             | cggatcgataagcttTCAATGGCGAGAA<br>TTGGAGGAAG     |                     |
| PbVND7       | cggatcgataagcttATTCCTTCTTCAGTA<br>TCTCTCCA          | tagaactagtggatccGCACCTGCATATC<br>AGGCA         |                     |
| PbXND1       | agctcggtagccgggatccATGGGAGATA<br>ACCAGTTTAAAGCTC    | CttgctcaccatggtgacATTTGGCAAA<br>CTTATTTTCATC   | Localiza-<br>on     |
| PbTCP4       | ccggggatcctctagaATGGGGGATTCTC<br>ACCACC             | aggaggccatgtagcATGGCGAGAATT<br>GGAGGAAG        |                     |
| PbXND1       | atggccatggaggccgaattcATGGGAGATA<br>ACCAGTTTAAAGCTC  | ccgctgcaggtcgacggatccTTATAGACGA<br>TACTCATGCA  |                     |
| PbXND1-C     | atggccatggaggccgaattcACAGAATACA<br>GTGGATATG        |                                                | Yeast<br>validation |
| PbXND1-N     |                                                     | gccgctgcaggtcgacTTATTTGGGTTGC<br>CCTC          |                     |
| PbTCP4       | gaggccagtgaattcATGGGGGATTCTCA<br>CCACC              | cgagctcgatggatccATGGCGAGAATTG<br>GAGGAAG       |                     |
| PbVND7       | aaaagcttgaattcgagctcATTCCTTCTTCA<br>GTATCTCTCCA     | gagcacatgcctcgagGCACCTGCATATC<br>AGGCA         | BIFC<br>Assay       |
| PbXND1       | ctggcgcgccactagtggatccATGGGAGAT<br>AACCAGTTTAAAGCTC | tccggggagcggtaccctcgagTTATTTGGG<br>TTGCCCTC    |                     |
| PbTCP4       | ctggcgcgccactagtggatccATGGGGGAT<br>TCTCACCACC       | tccggggagcggtaccctcgagATGGCGAG<br>AATTGGAGGAAG |                     |
| PbXND1-OX    | ggggacaagttgtacaaaaagcaggctgcATG                    | ggggaccactttgtacaaaaagctgggtctgtTT             | Plant               |

|                   |                                                                                              |                                                                                              |                            |
|-------------------|----------------------------------------------------------------------------------------------|----------------------------------------------------------------------------------------------|----------------------------|
|                   | GGAGATAACCAGTTTAAGCTC                                                                        | AATTTGGCAAACCTTATTTTCATC                                                                     | transform-<br>ation vector |
| PbXND1-RN<br>Ai   | ggggacaagttgtacaaaaagcaggctgcTATG<br>ATCCGTGGGAACTAAA                                        | ggggaccactttgtacaagaagctgggtctgtGG<br>AAGAAGAAGCACAATCTG                                     |                            |
| PbTCP4-OX         | ggggacaagttgtacaaaaagcaggctgcATG<br>GGGGATTCTCACCACC                                         | ggggaccactttgtacaagaagctgggtcTCAA<br>TGGCGAGAATTGGAGGAAG                                     |                            |
| PbTCP4-RNAi       | ggggacaagttgtacaaaaagcaggctgcAAC<br>AGCGGAGACGGAGATAGC                                       | ggggaccactttgtacaagaagctgggtctgtAT<br>GATGGTCGTGAGAAATGG                                     |                            |
| PbXND1-HIS        | tatcgatccgaattcATGGGAGATAACC<br>AGTTTAAGCTC                                                  | gtcgccgcaagcttATTTGGCAAACCT<br>TATTTTCATC                                                    | prokaryotic<br>expression  |
| GST-PbTCP4        | gggggccccctgggatccATGGGGGATTCT<br>CACCACC                                                    | gatcgccgctcgagTCAATGGCGAGA<br>ATTGGAGGAAG                                                    |                            |
| PbVND7-Bio-<br>3' | ACATGCAGGACCACTCACAGACA<br>TGCAGGACCACTCACAGACATGC<br>AGGACCACTCACAGACATGCAGG<br>ACCACTCACAG | CTGTGAGTGGTCCTGCATGTCTG<br>TGAGTGGTCCTGCATGTCTGTGA<br>GTGGTCCTGCATGTCTGTGAGTG<br>GTCCTGCATGT | EMSA                       |
| PbVND7            | ACATGCAGGACCACTCACAGACA<br>TGCAGGACCACTCACAGACATGC<br>AGGACCACTCACAGACATGCAGG<br>ACCACTCACAG | CTGTGAGTGGTCCTGCATGTCTG<br>TGAGTGGTCCTGCATGTCTGTGA<br>GTGGTCCTGCATGTCTGTGAGTG<br>GTCCTGCATGT |                            |

---

Note: Lowercase show vector adaptor

#### Table S2 Accession numbers

The genes sequences can downloaded from the NCBI database, and the genes and their accession numbers are as follows:

| Abbreviation | Accession number | Abbreviation | Accession number |
|--------------|------------------|--------------|------------------|
| PbXND1       | LOC103926530     | AtNST1       | At2g46770        |
| PbTCP4       | LOC103932452     | AtNST2       | At3g61910        |
| PbVND7       | LOC103964117     | AtSND3       | At1g28470        |
| PbMYB46      | LOC103963897     | AtSND2       | At4g28500        |
| PbMYB83      | LOC103954864     | AtATAF2      | At5g08790        |
| PbNST1       | LOC103956366     | AtATAF1      | At1g01720        |
| PbCESA4      | LOC103959701     | AtXND1       | At5g64530        |
| PbCESA7      | LOC103956004     | AtTCP10      | At2g31070        |
| PbCESA8      | LOC103943043     | AtTCP13      | At3g02150        |
| PbC3H        | LOC103944996     | AtTCP14      | AT3G47620        |

|           |              |         |           |
|-----------|--------------|---------|-----------|
| PbHCT     | LOC103945380 | AtTCP15 | AT1G69690 |
| PbCCR     | LOC103945355 | AtTCP3  | At1g53230 |
| Pb4CL     | LOC103927375 | AtTCP4  | At3g15030 |
| PbCCoAOMT | LOC103933993 | AtTCP21 | At5g08330 |
| PbCAD     | LOC103928508 | AtTCP23 | At1g35560 |
| AtVND6    | At5g62380    | AtTCP9  | At2g45680 |
| AtVND7    | At1g71930    | AtTCP18 | At3g18550 |
| AtVND3    | At5g66300    | AtTCP5  | At5g60970 |
| AtVND1    | At2g18060    | AtTCP2  | At4g18390 |
| AtVND5    | At1g62700    | AtTCP19 | At5g51910 |
| AtVND2    | At4g36160    | AtTCP16 | At3g45150 |
| AtVND4    | At1g12260    | AtTCP20 | At3g27010 |
| AtSND1    | At1g32770    | AtTCP24 | At1g30210 |
| AtTCP7    | At5g23280    | AtTCP12 | At1g68800 |
| AtTCP1    | At1g67260    | AtTCP6  | At5g41030 |
| AtTCP11   | At2g37000    | AtTCP22 | At1g72010 |
| AtTCP8    | At1g58100    | AtTCP17 | At5g08070 |

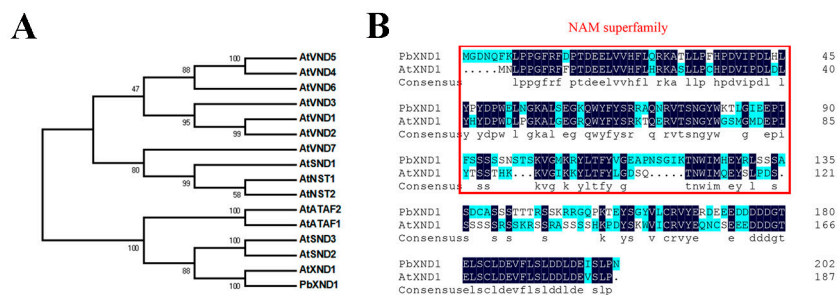

**Figure S1 Phylogenetic analysis and sequence alignment of PbXND1. A-B** Phylogenetic tree and sequence alignment of PbXND1. The neighbor-joining tree and a bootstrap test with 1000 iterations were constructed using the MEGA7. The NAC DNA-binding functional regions are marked in the red box.

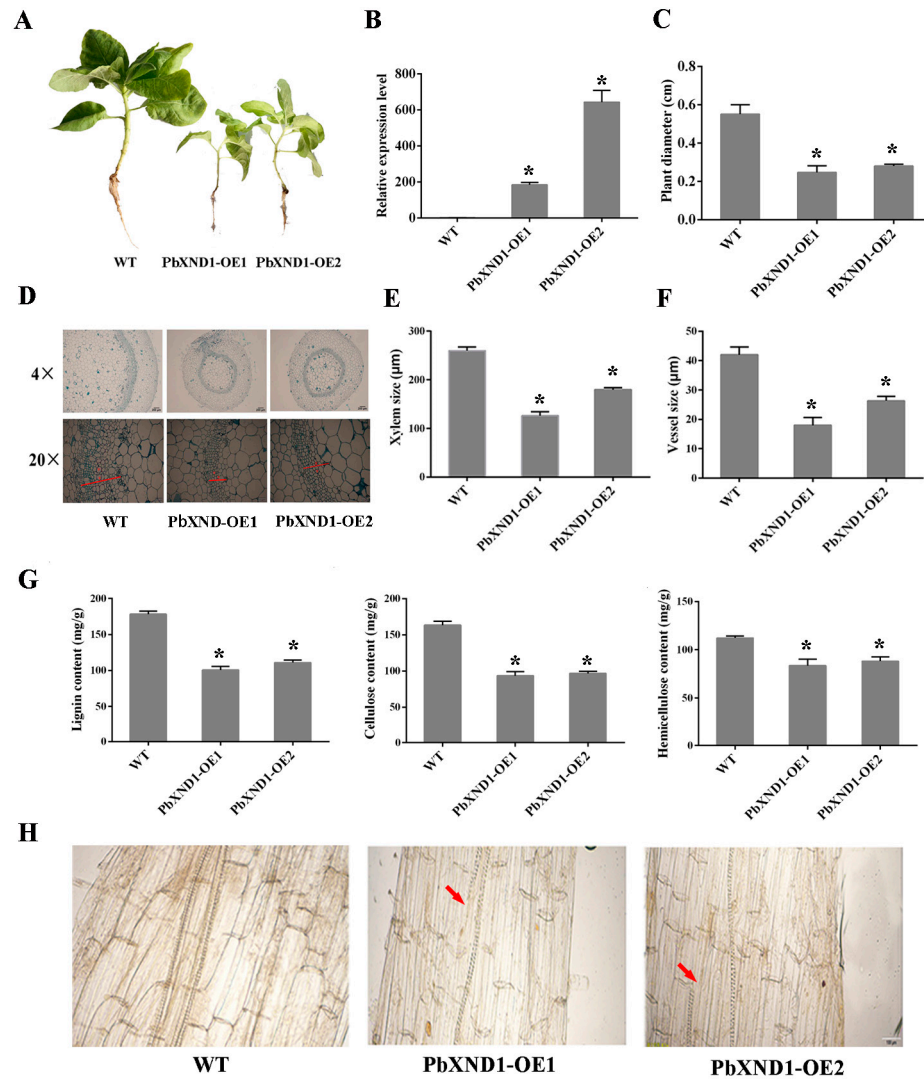

**Figure S2 PbXND1 inhibited xylem development in transgenic tobacco.** **A** The growth phenotypes of one-month-old PbXND1 overexpressed tobacco plants and wild-type plants. Bars=1 cm. **B** Relative expression of PbXND1. **C** plant diameter in tobacco plants. Data are means  $\pm$  sd (n=3). **D** Cross sections of stems from tobacco plants stained with safranin O and fast green. X, xylem; V, vessel. Bars, 200  $\mu$ m and 50  $\mu$ m. **E** Xylem size. **F** vessel size. **G** Lignin, Cellulose and Hemicellulose content. One week-old tobacco stems were used as experimental material, Data are means  $\pm$  sd (n=6). One-way ANOVA (Tukey test) was performed, and statistically significant differences are indicated by \* $P < 0.05$ . **H** Microscopic observation of tobacco root system. The red arrow indicates the vessel element.

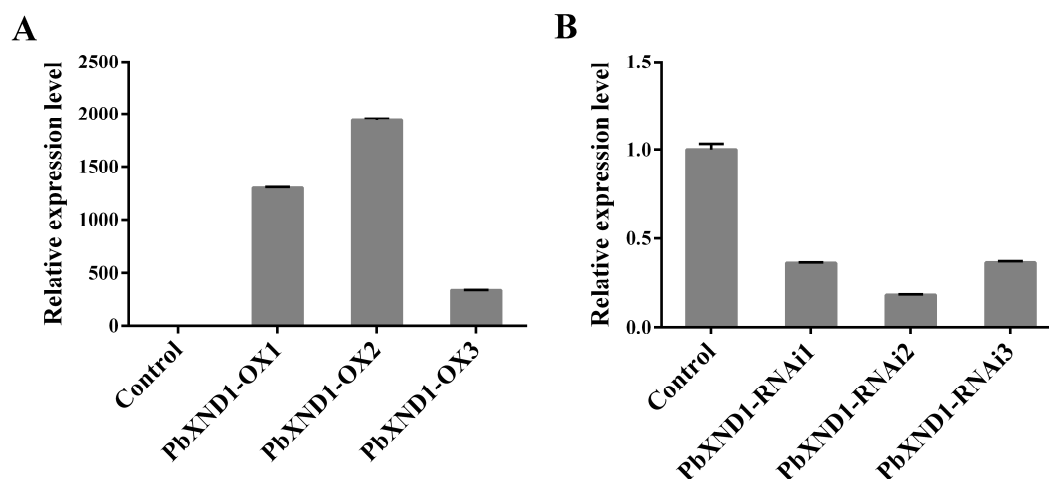

Figure S3 (A,B) The expression level of PbXND1 in the overexpression and RNAi pear. Data are means  $\pm$  sd (n=3).

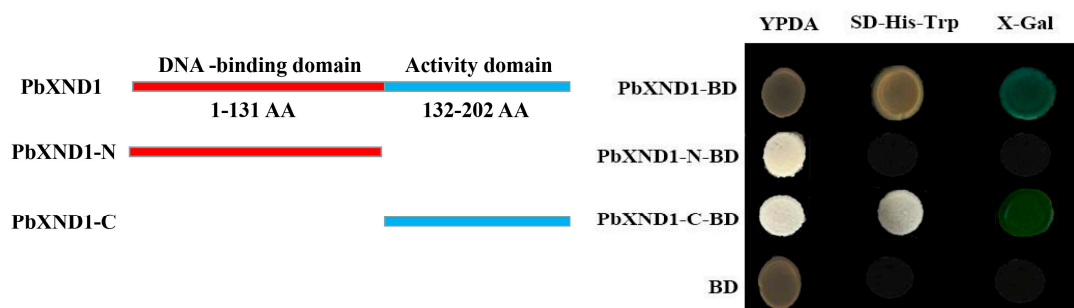

Figure S4 Transcriptional activation assays of PbXND1.

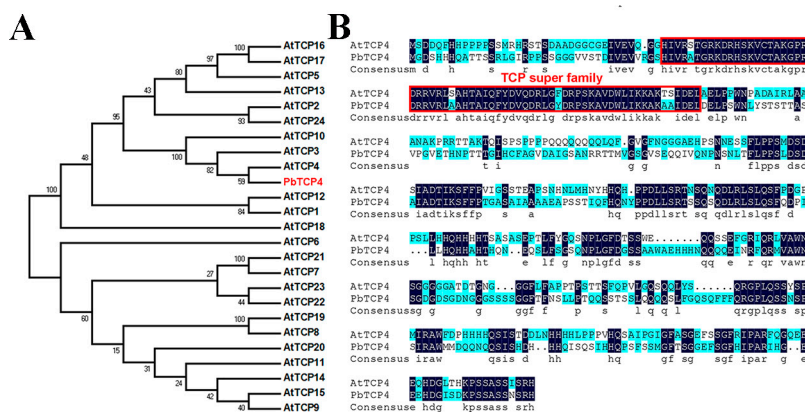

Figure S5 Phylogenetic analysis and sequence alignment of PbTCP4. A-B Phylogenetic tree and sequence alignment of and PbTCP4. The neighbor-joining tree and a bootstrap test with 1000 iterations were constructed using the MEGA7. The TCP DNA-binding functional regions are marked in the red box.

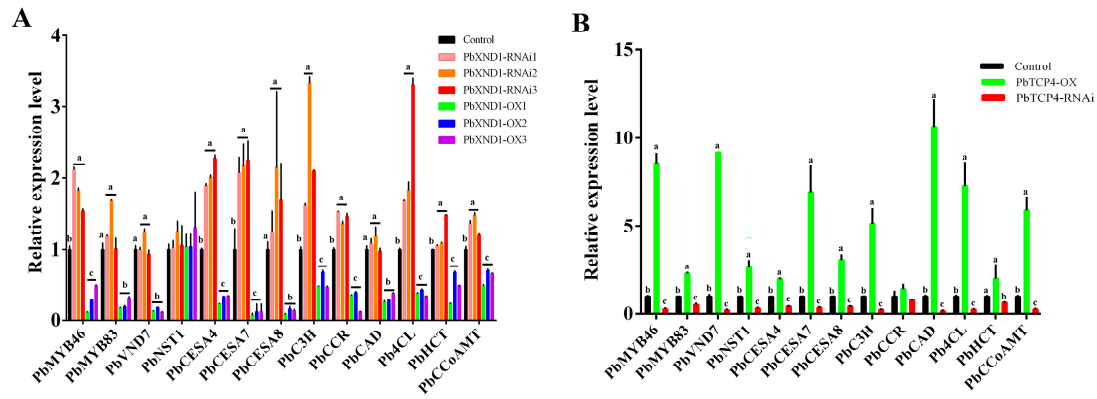

**Figure S6 PbXND1 and PbTCP4 regulate the expression of xylem-related genes in pear.** **A** PbXND1 inhibited the expression of secondary wall related transcription factors and functional genes. **B** PbTCP4 promoted the expression of secondary wall related transcription factors and functional genes. Data are means  $\pm$  SD (n=3). Different letters denote statistical significance ( $p < 0.05$ ).

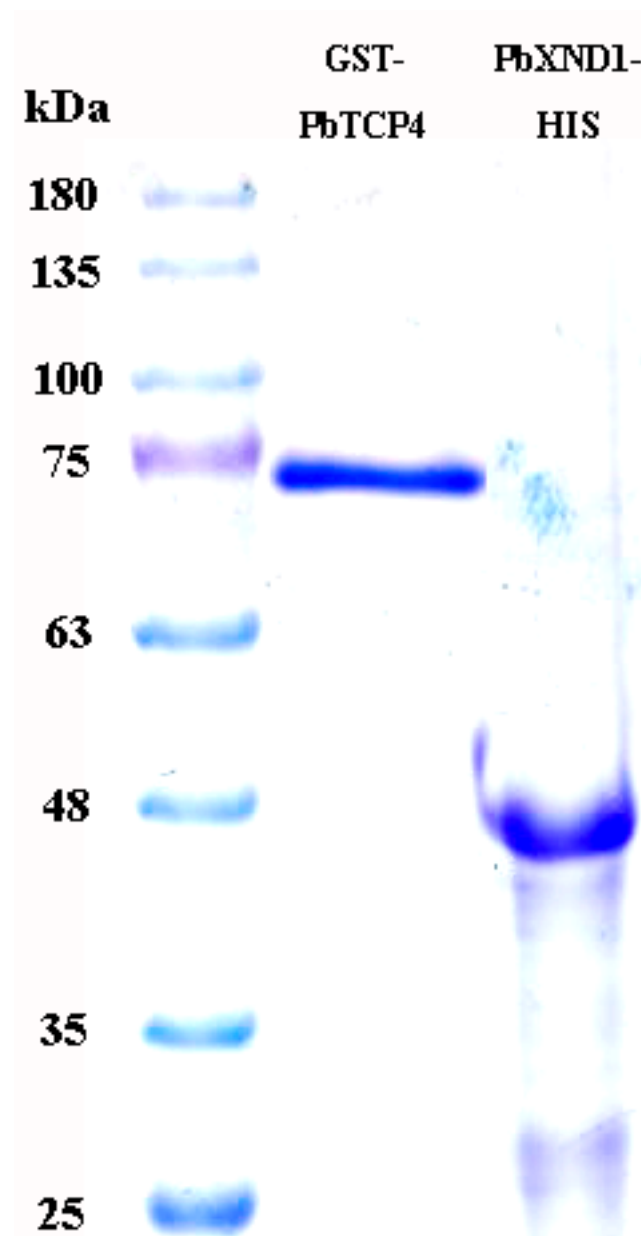

Figure S7 The purified GST-PbTCP4 and PbXND1-HIS was detected by SDS-PAGE.

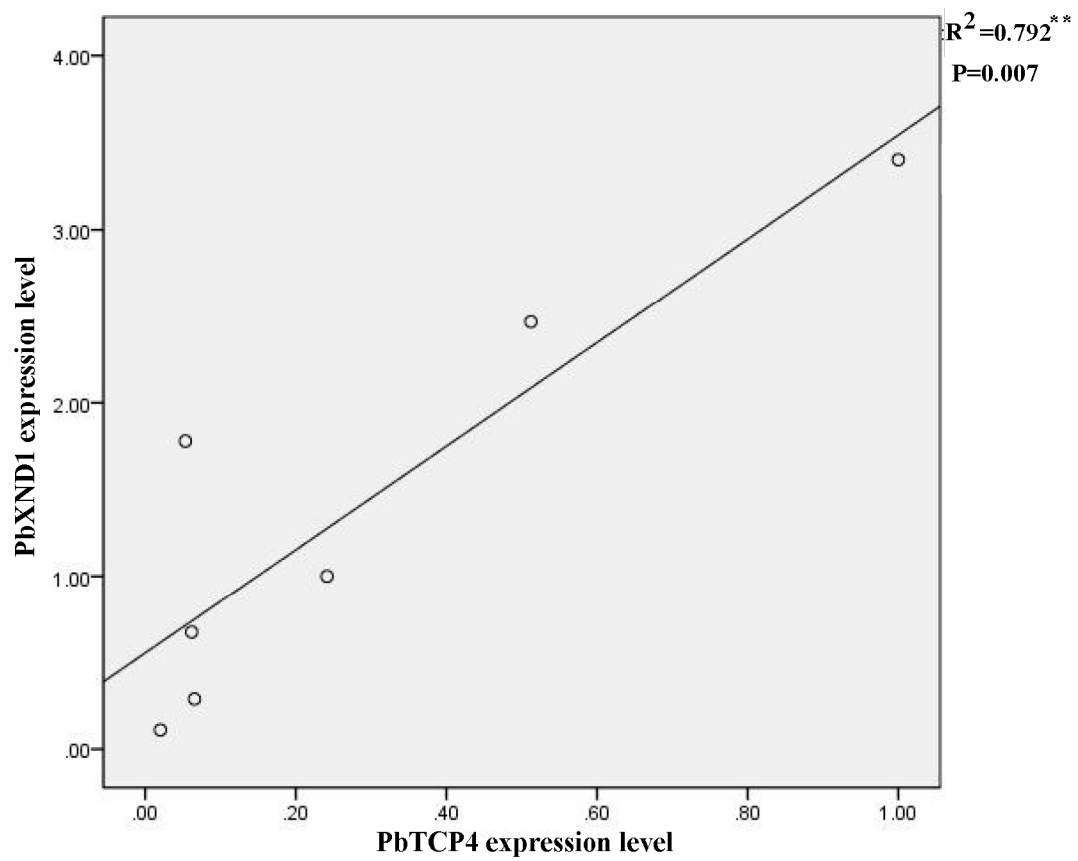

**Figure S8 Correlation analysis of PbXND1 and PbTCP4 in different tissues and development stages. \*\* denote statistical significance ( $p < 0.01$ ).**
